# Supplementary material for: A Structural Model of the Human α7 Nicotinic Receptor in an Open Conformation
Source: PubMed Central journal article supplement (PMC4514475; doi:10.1371/journal.pone.0133011), 2015-07-24
Supplement: pone.0133011.s010.pdf [file pone.0133011.s010.pdf]

## EPIBATIDINE TOPOLOGY AND FORCE FIELD PARAMETERS

|      |         |           |
|------|---------|-----------|
| MASS | 1 CAEP  | 12.010000 |
| MASS | 2 NBEP  | 14.010000 |
| MASS | 3 C3EP  | 12.010000 |
| MASS | 4 N3EP  | 14.010000 |
| MASS | 5 CLEP  | 35.450000 |
| MASS | 6 HAEP  | 1.008000  |
| MASS | 7 H4EP  | 1.008000  |
| MASS | 8 HCEP  | 1.008000  |
| MASS | 9 H1EP  | 1.008000  |
| MASS | 10 HNEP | 1.008000  |

RESI EPJ 0.000

GROUP

|          |      |           |
|----------|------|-----------|
| ATOM C1  | CAEP | 0.622911  |
| ATOM N1  | NBEP | -0.627378 |
| ATOM C2  | CAEP | 0.445547  |
| ATOM C3  | CAEP | -0.361159 |
| ATOM C4  | CAEP | 0.109501  |
| ATOM C5  | CAEP | -0.379982 |
| ATOM C6  | C3EP | 0.103899  |
| ATOM C7  | C3EP | -0.198116 |
| ATOM C8  | C3EP | 0.213445  |
| ATOM N2  | N3EP | -0.597024 |
| ATOM C9  | C3EP | -0.025018 |
| ATOM C10 | C3EP | 0.039794  |
| ATOM C11 | C3EP | -0.182912 |
| ATOM C11 | CLEP | -0.144477 |
| ATOM H1  | HAEP | 0.152884  |
| ATOM H2  | HAEP | 0.085448  |
| ATOM H3  | H4EP | -0.045533 |
| ATOM H4  | HCEP | 0.077382  |
| ATOM H5  | HCEP | 0.070098  |
| ATOM H6  | H1EP | 0.039502  |
| ATOM H7  | HCEP | 0.070098  |
| ATOM H8  | HCEP | 0.050828  |
| ATOM H9  | HCEP | 0.050828  |
| ATOM H10 | HCEP | 0.008790  |
| ATOM H11 | HCEP | 0.008790  |
| ATOM H12 | H1EP | 0.083825  |
| ATOM H13 | HNEP | 0.328031  |

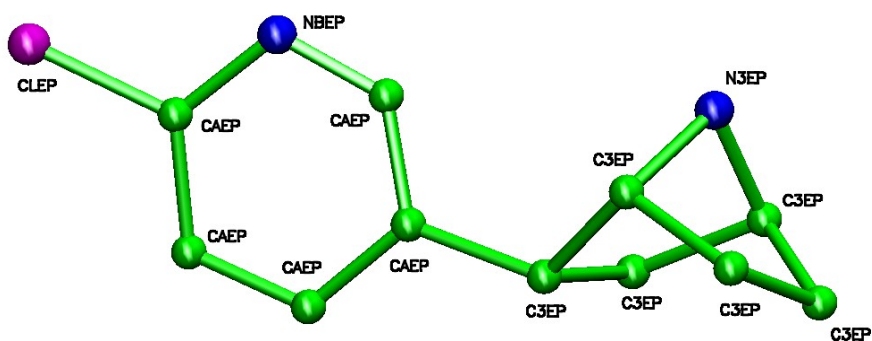

### BONDS

|           |        |       |
|-----------|--------|-------|
| CAEP NBEP | 483.10 | 1.342 |
| CAEP CAEP | 478.40 | 1.387 |
| CAEP H4EP | 342.90 | 1.088 |
| CAEP CLEP | 322.80 | 1.729 |
| CAEP HAEP | 344.30 | 1.087 |
| C3EP CAEP | 323.50 | 1.513 |
| C3EP C3EP | 303.10 | 1.535 |
| C3EP HCEP | 337.30 | 1.092 |
| C3EP N3EP | 320.60 | 1.470 |
| C3EP H1EP | 335.90 | 1.093 |
| HNEP N3EP | 394.10 | 1.018 |

### ANGLES

|                |        |         |
|----------------|--------|---------|
| CAEP NBEP CAEP | 68.590 | 115.860 |
| CAEP CAEP CAEP | 67.180 | 119.970 |
| CAEP CAEP C3EP | 63.840 | 120.630 |
| NBEP CAEP CAEP | 69.160 | 122.630 |
| NBEP CAEP H4EP | 51.820 | 115.940 |
| NBEP CAEP CLEP | 65.810 | 116.150 |
| CAEP CAEP HAEP | 48.460 | 120.010 |
| CAEP CAEP CLEP | 62.920 | 119.400 |
| CAEP CAEP H4EP | 48.240 | 121.090 |
| CAEP C3EP C3EP | 63.250 | 112.090 |
| CAEP C3EP HCEP | 46.960 | 110.150 |
| C3EP C3EP C3EP | 63.210 | 110.630 |
| C3EP C3EP HCEP | 46.370 | 110.050 |
| C3EP C3EP N3EP | 66.180 | 110.380 |
| C3EP C3EP H1EP | 46.360 | 110.070 |
| C3EP N3EP C3EP | 64.010 | 110.900 |
| C3EP N3EP HNEP | 47.130 | 109.920 |
| N3EP C3EP H1EP | 49.390 | 109.920 |
| HCEP C3EP HCEP | 39.430 | 108.350 |

**DIHEDRALS**

|                     |       |   |       |
|---------------------|-------|---|-------|
| X CAEP NBEP X       | 4.800 | 2 | 180.0 |
| X CAEP CAEP X       | 3.625 | 2 | 180.0 |
| X C3EP CAEP X       | 0.000 | 2 | 0.0   |
| X C3EP C3EP X       | 0.156 | 3 | 0.0   |
| C3EP C3EP C3EP C3EP | 0.180 | 3 | 0.0   |
| C3EP C3EP C3EP C3EP | 0.250 | 2 | 180.0 |
| C3EP C3EP C3EP C3EP | 0.200 | 1 | 180.0 |
| HCEP C3EP C3EP C3EP | 0.160 | 3 | 0.0   |
| HCEP C3EP C3EP HCEP | 0.150 | 3 | 0.0   |
| X C3EP N3EP X       | 0.300 | 3 | 0.0   |
| C3EP C3EP C3EP C3EP | 0.300 | 3 | 0.0   |
| C3EP C3EP N3EP C3EP | 0.480 | 2 | 180.0 |

**IMPROPER DIHEDRALS**

|                     |       |   |       |
|---------------------|-------|---|-------|
| CAEP H4EP CAEP NBEP | 1.100 | 2 | 180.0 |
| CAEP CLEP CAEP NBEP | 1.100 | 2 | 180.0 |
| X X CAEP HAEP       | 1.100 | 2 | 180.0 |
| C3EP CAEP CAEP CAEP | 1.100 | 2 | 180.0 |

**NONBONDED**

| !    | Emin         | Rmin/2  | Emin/2 | Rmin (for 1-4's)    |
|------|--------------|---------|--------|---------------------|
| !    | (kCALOI/mol) | (A)     |        |                     |
| CAEP | 0.00         | -0.0860 | 1.9080 | 0.00 -0.0430 1.9080 |
| NBEP | 0.00         | -0.1700 | 1.8240 | 0.00 -0.0850 1.8240 |
| C3EP | 0.00         | -0.1094 | 1.9080 | 0.00 -0.0547 1.9080 |
| N3EP | 0.00         | -0.1700 | 1.8240 | 0.00 -0.0850 1.8240 |
| CLEP | 0.00         | -0.2650 | 1.9480 | 0.00 -0.1325 1.9480 |
| HAEP | 0.00         | -0.0150 | 1.4590 | 0.00 -0.0075 1.4590 |
| H4EP | 0.00         | -0.0150 | 1.4090 | 0.00 -0.0075 1.4090 |
| HCEP | 0.00         | -0.0157 | 1.4870 | 0.00 -0.0078 1.4870 |
| H1EP | 0.00         | -0.0157 | 1.3870 | 0.00 -0.0078 1.3870 |
| HNEP | 0.00         | -0.0157 | 0.6000 | 0.00 -0.0078 0.6000 |
